# Supplementary material for: Two Origins, Two Functions: The Discovery of Distinct Secretory Ducts Formed during the Primary and Secondary Growth in Kielmeyera
Source: MDPI journal article supplement (doi:10.3390/plants10050877), 2021-04-27
Supplement: s1 [file s1]

## Supplementary Material

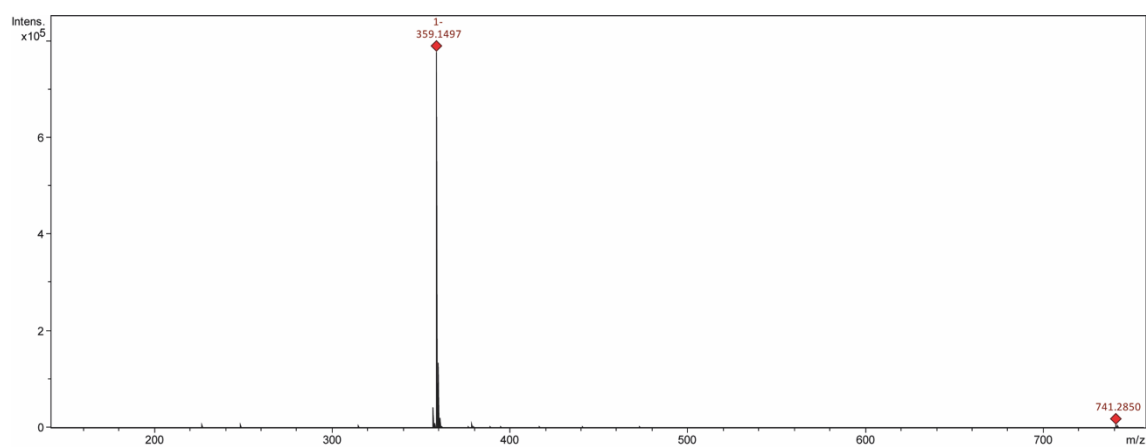

**Figure S1.** High-resolution mass spectrum of compound corresponding to peak 1, negative mode.

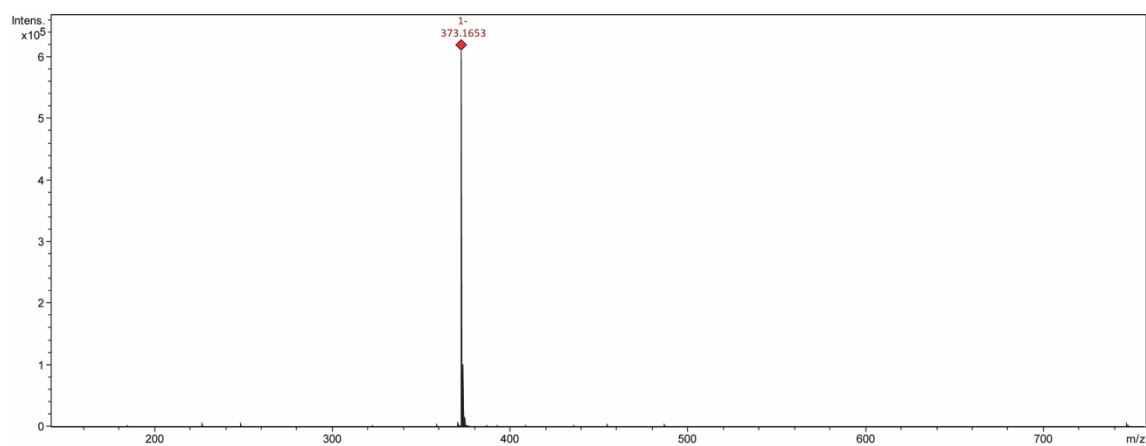

**Figure S2.** High-resolution mass spectrum of compound corresponding to peak 2, negative mode.

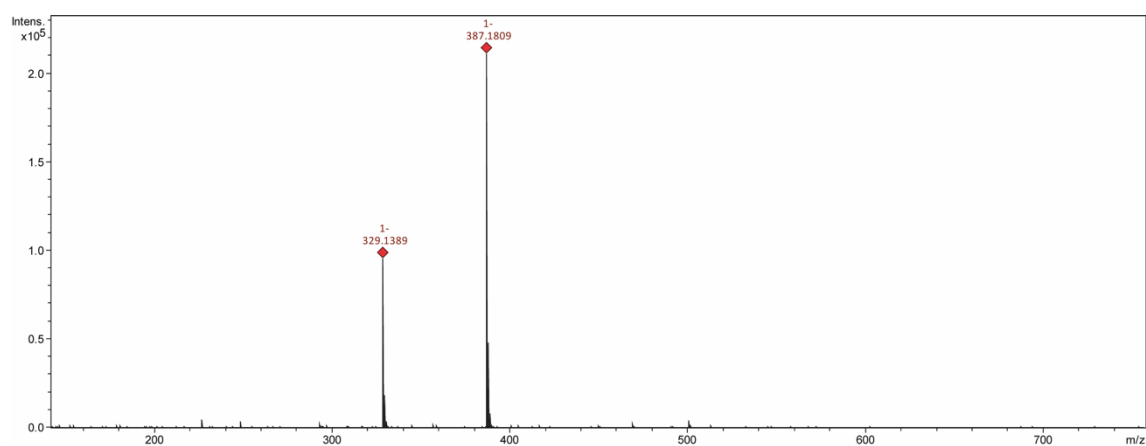

**Figure S3.** High-resolution mass spectrum of compound corresponding to peak 3, negative mode.

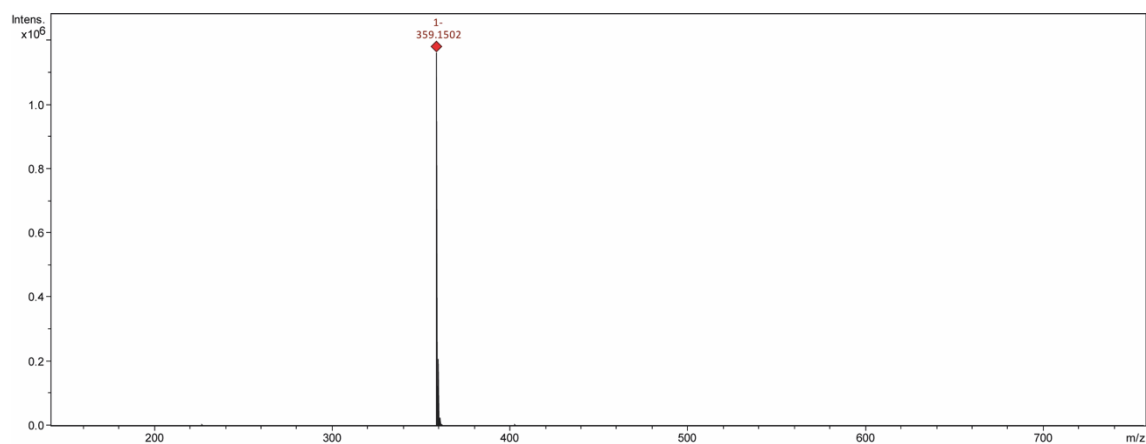

**Figure S4.** High-resolution mass spectrum of compound corresponding to peak 4, negative mode.

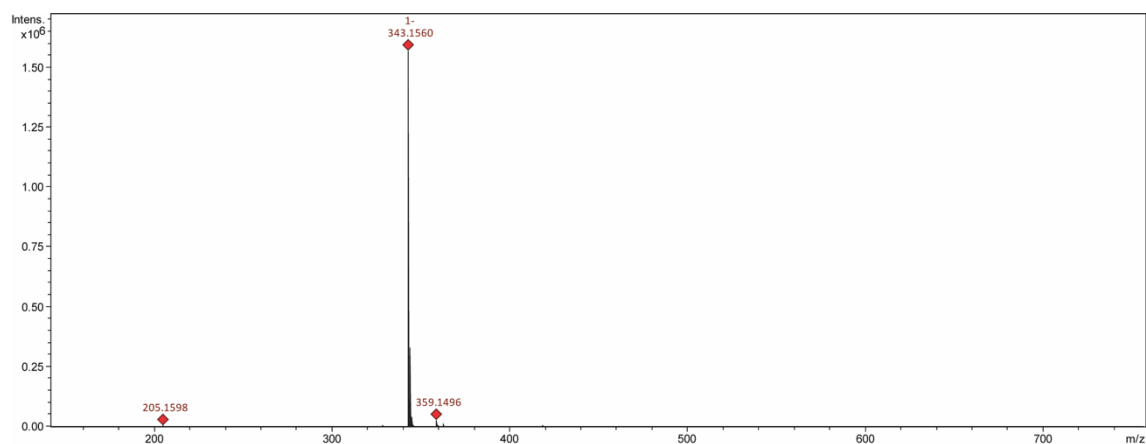

**Figure S5.** High-resolution mass spectrum of compound corresponding to peak 5, negative mode.

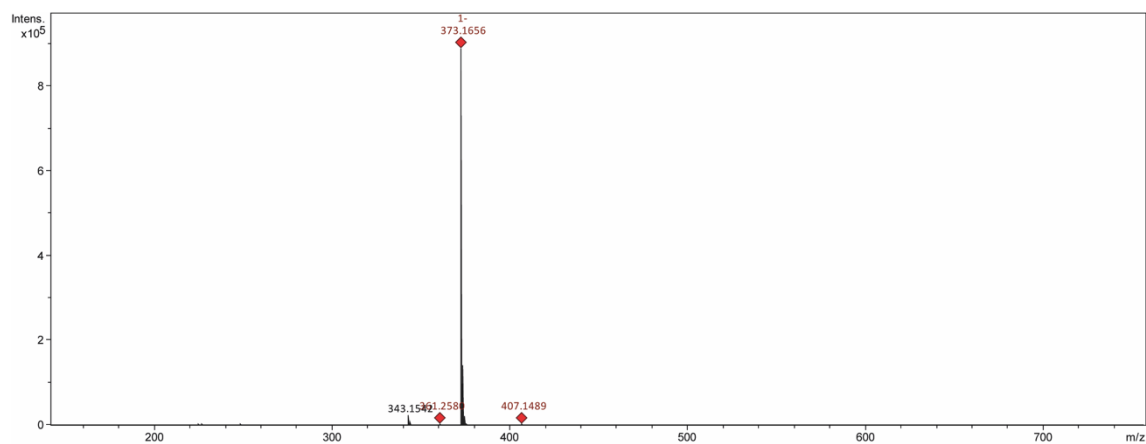

**Figure S6.** High-resolution mass spectrum of compound corresponding to peak 6, negative mode.

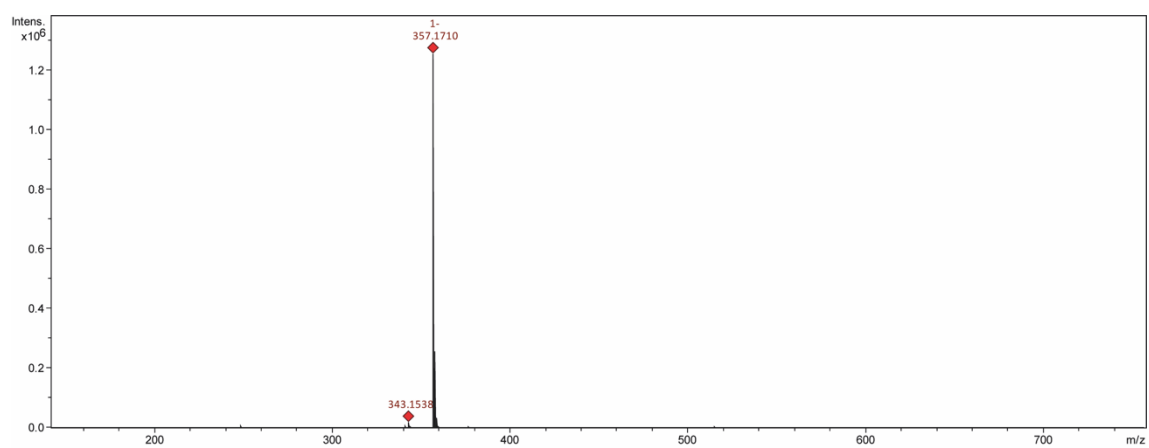

**Figure S7.** High-resolution mass spectrum of compound corresponding to peak 7, negative mode.
